# Supplementary material for: N-Doped Mesoporous Carbon Prepared from a Polybenzoxazine Precursor for High Performance Supercapacitors
Source: MDPI journal article supplement (doi:10.3390/polym13132048), 2021-06-22
Supplement: s1 [file s1]

## Article

# N-Doped Mesoporous Carbon Prepared from a Polybenzoxazine Precursor for High Performance Supercapacitors

Periyasamy Thirukumaran <sup>†</sup>, Raji Atchudan <sup>†</sup>, Asrafali Shakila Parveen, Madhappan Santhamoorthy, Vanaraj Ramkumar and Seong-Cheol Kim <sup>\*</sup>

School of Chemical Engineering, Yeungnam University, Gyeongsan 38541, Korea; thiru.kumaran999@gmail.com (P.T.); atchudanr@gmail.com (R.A.); shakilaasraf@gmail.com (A.S.P.); santham83@gmail.com (M.S.); sriram27@gmail.com (V.R.)

<sup>\*</sup> Correspondence: sckim07@ynu.ac.kr

<sup>†</sup> These authors contributed equally to this work.

## Synthesized of benzoxazines monomers (HPh-Bzo).

In a three necked round bottomed flask equipped with a magnetic stirrer and a reflux condenser, paraformaldehyde (18.0 g, 0.6 m), was taken and 100 mL of DMSO was added to it. It was then allowed to stir while maintaining the temperature at 70°C. phenylethylamine (24.2 g, 0.2 m) was added dropwise to the stirring mixture. In the meantime, a solution containing hydroquinon (11.0 g, 0.1 m) in 20 mL of DMSO was prepared separately. After complete addition of phenylethylamine, the solution of hydroquinon was added dropwise to the reaction mixture. The temperature was then slowly raised to 120°C. The reaction was then continuously stirred for 5h at this temperature. On completion of the reaction time, a transparent pale yellow colored solution was obtained. This solution was then cooled to room temperature and precipitated in 1N NaOH solution. The precipitate thus obtained was washed with distilled H<sub>2</sub>O several times, filtered and finally dried in vacuum at 60°C for 12 h to obtain the HPh-Bzo monomer (Scheme S1).

**Citation:** Thirukumaran, P.; Atchudana, R.; Parveena, A.S.; Santhamoorthy, M.; Ramkumara, V.; Kima, S.-C. N-Doped Mesoporous Carbon Prepared by Polybenzoxazine Precursor for High Performance Supercapacitor. *Polymers* **2021**, *13*, 2048.  
<https://doi.org/10.3390/polym13132048>

Academic Editor: Michael R. Buchmeiser

Received: 17 May 2021

Accepted: 12 June 2021

Published: 22 June 2021

**Publisher's Note:** MDPI stays neutral with regard to jurisdictional claims in published maps and institutional affiliations.

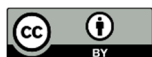

**Copyright:** © 2021 by the authors. Licensee MDPI, Basel, Switzerland. This article is an open access article distributed under the terms and conditions of the Creative Commons Attribution (CC BY) license (<http://creativecommons.org/licenses/by/4.0/>).

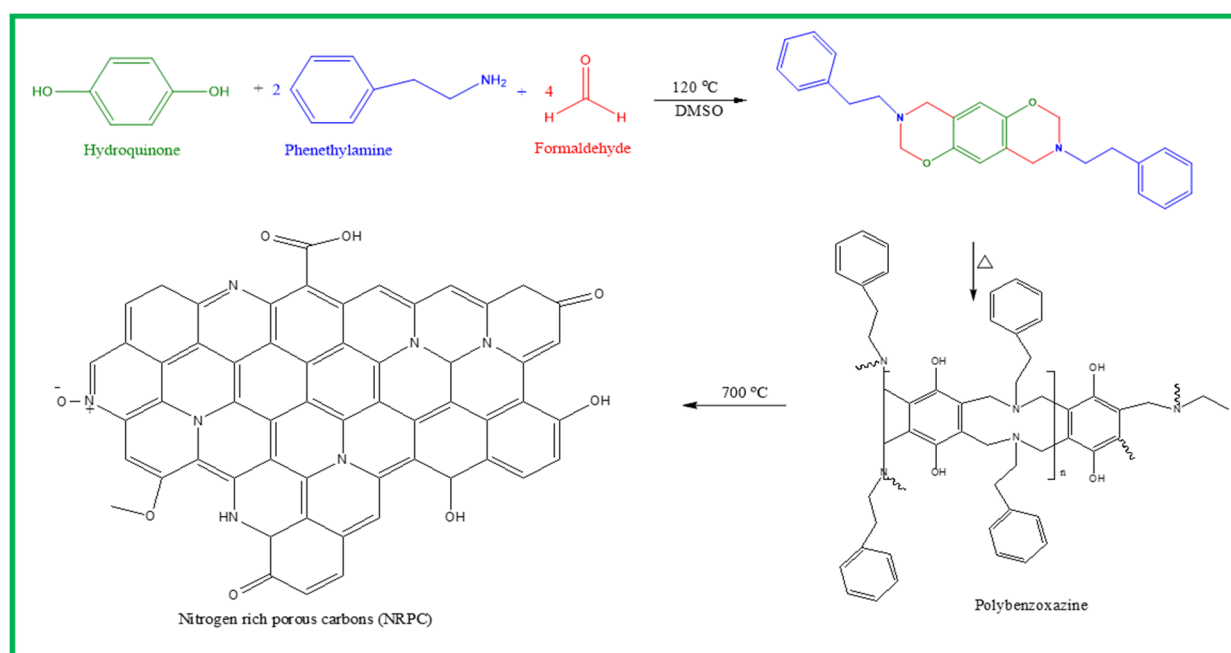

**Scheme S1.** Synthesized of benzoxazines monomers (HPh-Bzo).

### Characterization of the benzoxazine monomer.

The precursor of the polybenzoxazine-based nitrogen-rich carbons was synthesized by the Mannich reaction. Novel porous and high surface area carbons were obtained after carbonization and activation. Fourier transform infrared (FTIR) spectrum of the benzoxazine monomer (HPh-Bzo) was recorded and is shown in Figure S1. The specific adsorption band of at  $2848\text{ cm}^{-1}$  and at  $2963\text{ cm}^{-1}$  It's conforming to the symmetric and anti-symmetric stretching modes of the  $\text{CH}_2$  groups of in between oxazine ring and amine group, and contribution from the symmetric and anti-symmetric stretching vibration in  $\text{CH}_2$  of oxazine ring respectively<sup>1</sup>

There is no broad peak at  $3300\text{ cm}^{-1}$  due to all  $-\text{OH}$  groups are completely react with an amine group to form an oxazine ring. The peak at  $1654\text{ cm}^{-1}$ , due to the carbonyl stretching vibration of apigenin moiety. The characteristic absorptions of the oxazine ring structure of HPh-Bzo were seen at  $1024$  and  $1228\text{ cm}^{-1}$  attribute to the symmetric and asymmetric stretching modes of  $\text{C}-\text{O}-\text{C}$ , respectively, while the peak at  $939\text{ cm}^{-1}$  approves the formation of an oxazine ring. Also, the spectrum shows a peak at  $1148\text{ cm}^{-1}$  due to the  $\text{C}-\text{N}-\text{C}$  symmetric stretching vibrations. The  $^1\text{H}$ -NMR spectrum shown in Fig. S1 further confirms the structure of HPh-Bzo monomer having oxazine rings has resonance peaks at  $4.7\text{ ppm}$  and  $3.7\text{ ppm}$  that are assigned to  $\text{Ar}-\text{CH}_2-\text{N}$  and  $\text{O}-\text{CH}_2-\text{N}$  of the oxazine ring, respectively. The methylene protons ( $-\text{CH}_2$ ) connecting the amine group its appeared between  $2.5$  and  $3.5\text{ ppm}$ . Aromatic protons appear between  $7.0$  and  $7.6\text{ ppm}$ . The  $^{13}\text{C}$ -NMR spectra also confirm the structures of HPh-Bzo. The typical carbon resonance of the oxazine ring is found at  $82$ , and  $52\text{ ppm}$  for  $\text{Ar}-\text{CH}_2-\text{N}$  and  $\text{O}-\text{CH}_2-\text{N}$ , respectively. The methylene carbons ( $-\text{CH}_2$ ) connecting the amine group its appeared between e peaks between  $110$  and  $120\text{ ppm}$ . Other aromatic carbons appear in between  $120$  and  $150\text{ ppm}$ . The peak at  $40\text{ ppm}$  is due to the solvent peak (DMSO)

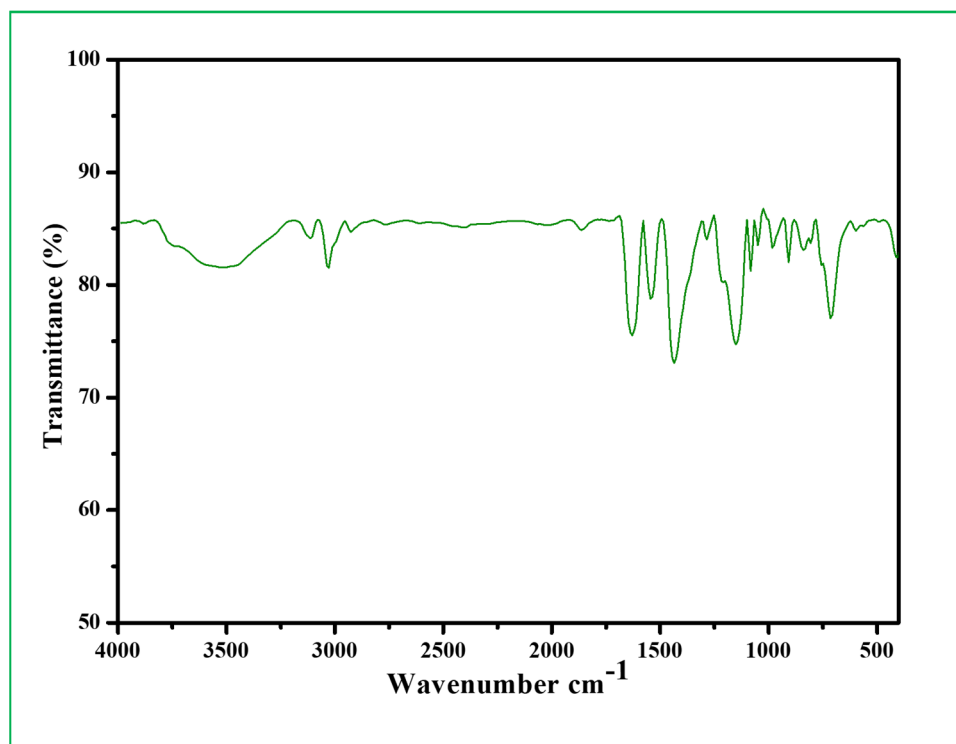

Figure S1. FT-IR spectrum benzoxazines monomers (HPh-Bzo).

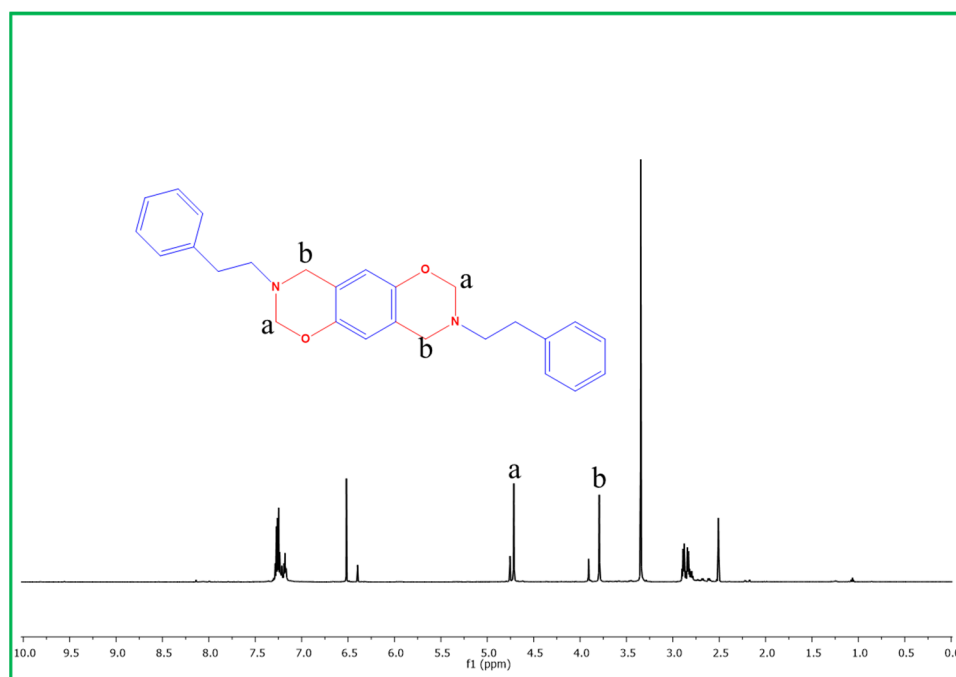

Figure S2.  $^1\text{H}$ -NMR spectrum benzoxazines monomers (HPh-Bzo).

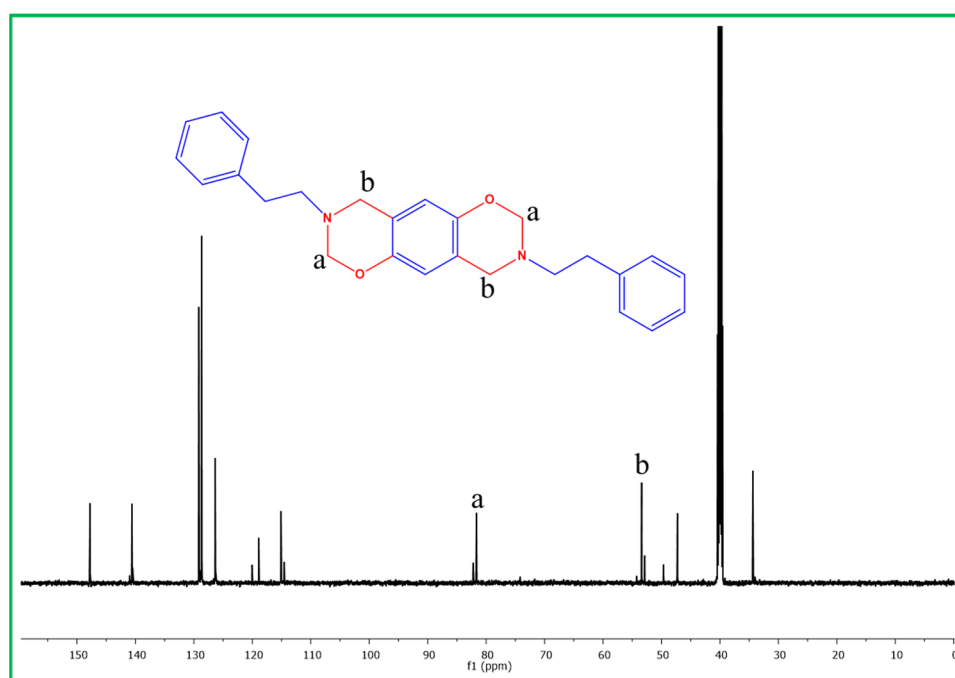

**Figure S3.**  $^{13}\text{C}$ -NMR spectrum benzoxazines monomers (HPh-Bzo).
